# Supplementary material for: Smoking and Adverse Outcomes in Patients With CKD: The Study of Heart and Renal Protection (SHARP)
Source: PubMed Central journal article supplement (PMC4996629; doi:10.1053/j.ajkd.2016.02.052), 2016-09
Supplement: mmc1.pdf [file mmc1.pdf]

**Table S1: Baseline characteristics and laboratory measures by smoking groups**

|                                          | Smoking category        |                        |                               | P-value‡ |
|------------------------------------------|-------------------------|------------------------|-------------------------------|----------|
|                                          | Current smoker (n=1243) | Former smoker (n=3272) | Never regular smoker (n=4755) |          |
| Total cholesterol (mg/dL)                | 186 (45)                | 189 (46)               | 190 (46)                      | 0.1      |
| LDL cholesterol (mg/dL)                  | 105 (34)                | 107 (34)               | 108 (34)                      | 0.004    |
| HDL cholesterol (mg/dL)                  | 44 (13)                 | 43 (13)                | 43 (13)                       | 0.02     |
| Triglycerides (mg/dL)                    | 207 (154)               | 212 (156)              | 201 (156)                     | 0.02     |
| Phosphate (mg/dL)                        | 4.57 (1.48)             | 4.40 (1.52)            | 4.36 (1.46)                   | <0.001   |
| Hemoglobin (g/dL)                        | 12.33 (1.68)            | 12.14 (1.72)           | 12.16 (1.65)                  | 0.003    |
| Co-medication                            |                         |                        |                               |          |
| Antiplatelet therapy                     | 26%                     | 23%                    | 22%                           | 0.008    |
| Oral anticoagulant therapy               | 2%                      | 4%                     | 3%                            | 0.03     |
| ACE inhibitor or ARB                     | 54%                     | 54%                    | 55%                           | 0.6      |
| Beta blocker                             | 39%                     | 38%                    | 38%                           | 0.8      |
| Calcium channel blocker                  | 42%                     | 42%                    | 41%                           | 0.7      |
| Diuretic                                 | 42%                     | 43%                    | 40%                           | 0.06     |
| Erythropoiesis stimulating agent         | 26%                     | 28%                    | 27%                           | 0.3      |
| Sevelamer                                | 9%                      | 8%                     | 8%                            | 0.3      |
| Renal diagnosis†                         |                         |                        |                               | 0.005    |
| Glomerulonephritis                       | 14%                     | 18%                    | 18%                           |          |
| Diabetic nephropathy                     | 16%                     | 16%                    | 13%                           |          |
| Hypertensive/renovascular                | 20%                     | 15%                    | 17%                           |          |
| Cystic kidney disease                    | 10%                     | 11%                    | 12%                           |          |
| Pyelonephritis                           | 7%                      | 7%                     | 7%                            |          |
| Other known cause                        | 22%                     | 20%                    | 19%                           |          |
| Unknown cause                            | 12%                     | 14%                    | 13%                           |          |
| Randomized to simvastatin plus ezetimibe | 50%                     | 50%                    | 50%                           | 0.9      |

Note: Mean (SD) or % shown, adjusted for age, sex, ethnicity, education, prior vascular disease and prior diabetes. Conversion factors for units: cholesterol in mg/dL to mmol/L, x0.02586; triglycerides in mg/dL to mmol/L, x0.01129; phosphate in mg/dL to mmol/L, x0.3229. †Among those not on dialysis at randomization. ‡P value for test of heterogeneity between the three smoking categories.
