# Supplementary material for: Smoking and Adverse Outcomes in Patients With CKD: The Study of Heart and Renal Protection (SHARP)
Source: PubMed Central journal article supplement (PMC4996629; doi:10.1053/j.ajkd.2016.02.052), 2016-09
Supplement: mmc2.pdf [file mmc2.pdf]

**Table S2: Estimated event rates (per 1000 per year) among current and never smokers with and without a prior diagnosis of CVD and/or diabetes.**

|                        | Overall                          |                                |                                | Prior history of CVD/diabetes    |                                |                                | No prior history of CVD/diabetes |                                |                                |
|------------------------|----------------------------------|--------------------------------|--------------------------------|----------------------------------|--------------------------------|--------------------------------|----------------------------------|--------------------------------|--------------------------------|
|                        | Rate (SE) among current smokers* | Rate (SE) among never smokers* | Absolute excess risk† (95% CI) | Rate (SE) among current smokers* | Rate (SE) among never smokers* | Absolute excess risk† (95% CI) | Rate (SE) among current smokers* | Rate (SE) among never smokers* | Absolute excess risk† (95% CI) |
| Vascular events        | 93 (5)                           | 68 (2)                         | 25 (13 to 36)                  | 134 (8)                          | 98 (4)                         | 36 (19 to 52)                  | 67 (4)                           | 49 (2)                         | 18 (10 to 26)                  |
| Cancer incidence       | 22 (2)                           | 16 (1)                         | 6 (1 to 11)                    | 24 (3)                           | 17 (1)                         | 7 (1 to 12)                    | 21 (2)                           | 15 (1)                         | 6 (1 to 11)                    |
| All-cause mortality    | 86 (5)                           | 59 (2)                         | 28 (17 to 38)                  | 116 (7)                          | 80 (3)                         | 36 (22 to 50)                  | 66 (4)                           | 46 (2)                         | 21 (12 to 29)                  |
| Vascular mortality     | 28 (3)                           | 21 (1)                         | 7 (1 to 13)                    | 42 (4)                           | 32 (2)                         | 10 (1 to 19)                   | 18 (2)                           | 14 (1)                         | 4 (0 to 8)                     |
| Non-vascular mortality | 50 (4)                           | 32 (1)                         | 19 (10 to 27)                  | 63 (5)                           | 40 (2)                         | 23 (13 to 34)                  | 42 (3)                           | 27 (1)                         | 15 (9 to 22)                   |
| Cancer death           | 12 (2)                           | 5 (1)                          | 7 (3 to 11)                    | 15 (3)                           | 6 (1)                          | 9 (3 to 14)                    | 10 (2)                           | 4 (1)                          | 6 (2 to 9)                     |
| Respiratory death      | 12 (2)                           | 5 (1)                          | 7 (2 to 11)                    | 16 (3)                           | 7 (1)                          | 9 (3 to 15)                    | 9 (2)                            | 4 (1)                          | 5 (2 to 8)                     |

Note: \*Poisson regression was used to model the common linear dependence of the log annual event rate on baseline age, sex, ethnicity, country, education, prior vascular disease, prior diabetes and smoking status (current, former, never). Mean (SE) event rates (per 1000 per year) were then estimated by applying the regression coefficients back to the participant characteristics, but forcing the smoking status to be either current or never smokers, as appropriate (estimates by prior disease were constructed similarly).

†Absolute excess risks were calculated by subtracting estimated rates among never regular smokers from estimated rates among current smokers.
