# Supplementary material for: Smoking and Adverse Outcomes in Patients With CKD: The Study of Heart and Renal Protection (SHARP)
Source: PubMed Central journal article supplement (PMC4996629; doi:10.1053/j.ajkd.2016.02.052), 2016-09
Supplement: mmc3.pdf [file mmc3.pdf]

**Table S3: Summary of literature on relevance of smoking to cardiovascular morbidity and mortality**

| Author                | Year | Design      | Population              | Mean eGFR | Reported consumption among current smokers | Outcome                                                                                                                      | N    | Events                  | Average length of follow-up | Results (current vs not current smokers unless stated)                                                                      | Additional covariates included in model                                                                                                |
|-----------------------|------|-------------|-------------------------|-----------|--------------------------------------------|------------------------------------------------------------------------------------------------------------------------------|------|-------------------------|-----------------------------|-----------------------------------------------------------------------------------------------------------------------------|----------------------------------------------------------------------------------------------------------------------------------------|
| Grams <sup>1</sup>    | 2012 | Prospective | CKD (39.7 % female)     | 39        | Not stated                                 | Pre-ESRD mortality (from any cause)                                                                                          | 1722 | 243                     | Median 17.6 yrs             | HR 1.5 (1.01-2.23)                                                                                                          | Age, sex, ethnicity, SBP, cause of kidney disease, diabetes, presence of CVD, log 24-hour proteinuria, and eGFR.                       |
| Ricardo <sup>2</sup>  | 2015 | Prospective | CKD (48% female)        | 43        | Not stated                                 | Atherosclerotic vascular events; all-cause mortality                                                                         | 3006 | 355; 437                | Median 4 years              | HR 1.82 (1.33-2.5); 2.22 (1.67-2.94)                                                                                        | Age, sex, ethnicity, education, diabetes, dyslipidemia, hypertension, any CVD, ACEi/ARB, eGFR and log 24-hour urine protein excretion. |
| Muntner <sup>3</sup>  | 2005 | Prospective | CKD (67% female)        |           | Not collected                              | CHD                                                                                                                          | 807  | 108                     | Average 9 years             | HR 1.65 (1.01-2.67)                                                                                                         | Age, sex, ethnicity                                                                                                                    |
| Shlipak <sup>4</sup>  | 2005 | Prospective | CKD (53% female)        | 50        | Not reported                               | CV death                                                                                                                     | 1249 | 342                     | Average 8.6 years           | HR 1.82 (1.27-2.60)                                                                                                         | Age, sex, ethnicity, education, diuretic use, prevalent CV disease                                                                     |
| Foley <sup>5</sup>    | 2003 | Prospective | Dialysis (47.2% female) | N/A       | Not reported                               | Ischaemic heart disease; Congestive heart failure; cerebrovascular disease; peripheral vascular disease; all-cause mortality | 3941 | 232; 297; 64; 383; 1179 | Average 2.2 years           | Not associated [HR not given]; HR 1.59 (1.16-2.17); Not associated [HR not given]; HR 1.68 (1.27-2.22); HR 1.37 (1.15-1.64) | Age, sex, ethnicity, primary renal disorder, prior CV disease, diabetic status, dialysis modality                                      |
| Fishbane <sup>6</sup> | 1996 | Prospective | Dialysis (41% female)   | N/A       | Not reported                               | All-cause and CV mortality                                                                                                   | 132  | 28; 16                  | 1 year                      | Smoking history present vs absent: HR 0.9 (0.5-2.1); HR 1.2 (0.4-2.2)                                                       | Age, sex, ethnicity, diabetes, hypertension, cholesterol, kt/V, serum albumin, prior vascular disease, AAI                             |

**Abbreviations:**

2xCr = doubling of creatinine; 50% ↓eGFR = halving of eGFR; AAI = ankle-arm blood pressure index; ACEi = angiotensin converting enzyme inhibitor; ADPKD = autosomal dominant polycystic kidney disease; ARB = angiotensin receptor blocker; BMI = body-mass index; CCB = calcium channel blocker; CHD = coronary heart disease; CKD = chronic kidney disease; CVD = cardiovascular disease; DBP = diastolic blood pressure; DN = diabetic nephropathy; ESRD = end-stage renal disease; (e)GFR = (estimated) glomerular filtration rate; HR = hazard ratio; HDL-C = high density lipoprotein cholesterol; IgA = IgA nephropathy; IGT = impaired glucose tolerance; NSAID = non-steroidal anti-inflammatory drug; OR = odds ratio; PCR = protein creatinine ratio; SBP = systolic blood pressure

**Works Cited:**

1. Grams ME, Coresh J, Segev DL, Kucirka LM, Tighiouart H, Sarnak MJ. Vascular disease, ESRD, and death: interpreting competing risk analyses. *Clin J Am Soc Nephrol* 2012; **7** (10): 1606-1614
2. Ricardo AC, Anderson CA, Yang W, et al. Healthy lifestyle and risk of kidney disease progression, atherosclerotic events, and death in CKD: findings from the Chronic Renal Insufficiency Cohort (CRIC) Study. *Am J Kid Dis* 2015; **65** (3): 412-424
3. Muntner P, He J, Astor BC, Folsom AR, Coresh J. Traditional and nontraditional risk factors predict coronary heart disease in chronic kidney disease: results from the atherosclerosis risk in communities study. *J Am Soc Nephrol* 2005; **16** (2): 529-538
4. Shlipak MG, Fried LF, Cushman M, et al. Cardiovascular mortality risk in chronic kidney disease: comparison of traditional and novel risk factors. *J Am Med Assoc* 2005; **293** (14): 1737-1745
5. Foley RN, Herzog CA, Collins AJ. Smoking and cardiovascular outcomes in dialysis patients: The United States Renal Data System Wave 2 Study. *Kidney Int*. 2003; **63** (4): 1462-1467
6. Fishbane S, Youn S, Flaster E, Adam G, Maesaka JK. Ankle-arm blood pressure index as a predictor of mortality in hemodialysis patients. *Am J Kid Dis* 1996; **27** (5): 668-672
