# Supplementary material for: Smoking and Adverse Outcomes in Patients With CKD: The Study of Heart and Renal Protection (SHARP)
Source: PubMed Central journal article supplement (PMC4996629; doi:10.1053/j.ajkd.2016.02.052), 2016-09
Supplement: mmc4.pdf [file mmc4.pdf]

**Table S4: Summary of literature on relevance of smoking to development and progression of CKD**

| Author               | Year | Design      | Population | Mean eGFR | Reported consumption among current smokers | Outcome          | N      | Events | Average length of follow-up | Results (current vs not current smokers unless stated) | Additional covariates included in model                                                                                                                      |
|----------------------|------|-------------|------------|-----------|--------------------------------------------|------------------|--------|--------|-----------------------------|--------------------------------------------------------|--------------------------------------------------------------------------------------------------------------------------------------------------------------|
| Yoshida <sup>1</sup> | 2008 | Prospective | CKD        |           | Not stated                                 | Slope of 1/Cr    | 2012   | -      |                             | -2.06 ml/min; p=0.014                                  | Age, sex, high BMI, metabolic syndrome, proteinuria, hypertension, high triglyceride, low HDL-C, high fasting plasma glucose, ACEi/ARB therapy, CCB therapy  |
| Grams <sup>2</sup>   | 2012 | Prospective | CKD        | 39        | Not stated                                 | ESRD             | 1722   | 1099   | Median 17.6 yrs             | HR 1.3 (1.09-1.55)                                     | Age, sex, ethnicity, SBP, cause of kidney disease, diabetes, presence of CVD, log 24-hour proteinuria, and eGFR.                                             |
| Tanaka <sup>3</sup>  | 2013 | Prospective | CKD        | 55        | Not stated                                 | ESRD/2xCr        | 449    | 46     | Median 3.3 years            | HR 1.25 (0.41- 3.84)                                   | Age, sex, diabetes, hypertension, dyslipidemia, eGFR, proteinuria, serum albumin, skin autofluorescence                                                      |
| Ricardo <sup>4</sup> | 2015 | Prospective | CKD        | 43        | Not stated                                 | ESRD or 50%↓eGFR | 3006   | 726    | Median 4 years              | HR 1.47 (1.19-1.82)                                    | Age, sex, ethnicity, education, diabetes, dyslipidemia, hypertension, any CVD, ACEi/ARB, eGFR and log 24-hour urine protein excretion.                       |
| Haroun <sup>5</sup>  | 2003 | Prospective | General    |           | Not stated                                 | CKD              | 23,534 | 143    | 18 years                    | HR 2.6 (1.8–3.7)                                       | Age, sex, treated diabetes                                                                                                                                   |
| Shankar <sup>6</sup> | 2006 | Prospective | General    | n/a       | Not stated                                 | CKD              | 3392   | 114    | 5 years                     | HR: 1.93 (1.15-3.25) [current vs never smokers]        | Age, sex, education, body mass index, current NSAID use, hypertension status, diabetes status, history of CVD, and heavy drinking.                           |
| Ishani <sup>7</sup>  | 2006 | Prospective | General    | n/a       | Not stated                                 | ESRD             | 12,866 | 213    | 25 years                    | HR 1.84 (1.35-2.51)                                    | Age, black ethnicity, BMI, family history of diabetes, triglycerides, HDL-C, LDL-C, uric acid, fasting glucose, SBP, eGFR, haematocrit and urine proteinuria |

Staplin et al, *AJKD*, "Smoking and Adverse Outcomes in Patients With CKD: The Study of Heart and Renal Protection (SHARP)"

| Author                 | Year | Design       | Population | Mean eGFR | Reported consumption among current smokers                                            | Outcome              | N       | Events | Average length of follow-up | Results (current vs not current smokers unless stated)   | Additional covariates included in model                                                                                                                                                                                                                         |
|------------------------|------|--------------|------------|-----------|---------------------------------------------------------------------------------------|----------------------|---------|--------|-----------------------------|----------------------------------------------------------|-----------------------------------------------------------------------------------------------------------------------------------------------------------------------------------------------------------------------------------------------------------------|
| Yamagata <sup>8</sup>  | 2007 | Prospective  | General    | 80        | Not stated                                                                            | CKD3-5               | 123,764 | 19,411 | 10 years                    | HR 1.13 (1.05-1.22) in men;<br>1.16 (1.06-1.26) in women | Age, proteinuria, hematuria, concomitant proteinuria and hematuria, IGT, diabetes, hypertension, hypercholesterolemia, low HDL-C, hypertriglyceridemia, obesity, alcohol consumption                                                                            |
| Yacoub <sup>9</sup>    | 2010 | Case-control | General    | n/a       | Not stated                                                                            | CKD                  | 569     | 198    |                             | OR 1.63 (1.08-2.45) [current vs never smokers]           | Age and sex                                                                                                                                                                                                                                                     |
| Hallan <sup>10</sup>   | 2011 | Prospective  | General    | 97        | Average 14.5 pack years                                                               | CKD5                 | 65,589  | 124    | Median 10.3 yrs             | HR 4.01 (1.43-11.25) in <70;<br>1.09 (0.51-2.33) in ≥70  | Age, sex, high education, physical inactivity, diabetes, prevalent CVD, antihypertensive use, SBP, waist circumference, total/HDL-C, eGFR, ACR                                                                                                                  |
| Lipworth <sup>11</sup> | 2012 | Prospective  | General    | n/a       | Not stated                                                                            | ESRD                 | 79,943  | 662    | 4 yrs                       | HR 1.2 (1.02-1.4)                                        | Age, sex, recruitment source, education, annual household income, history of diabetes, hypertension, stroke, high cholesterol, and MI/CABG.                                                                                                                     |
| Carter <sup>12</sup>   | 2015 | Prospective  | General    |           | Cigarettes smoked per day:<br>Men 22.6% <10; 39.8% ≥ 20<br>Women 40.7% <10; 20.9% ≥20 | Renal death          | 954,029 | 1072   | 10 years                    | RR 2.1 (1.6-2.6) in men;<br>1.9 (1.5-2.5) in women       | Age, race, educational level, current alcohol use, and cohort.                                                                                                                                                                                                  |
| Paterson <sup>13</sup> | 2005 | Prospective  | ADPKD      | 83        | Average 18 pack years                                                                 | Creatinine clearance | 406     | -      |                             | ns                                                       | Univariate analyses                                                                                                                                                                                                                                             |
| Ozkok <sup>14</sup>    | 2013 | Prospective  | ADPKD      | 60        | Average 4.2 pack years                                                                | >1 ml/min/yr ↓GFR    | 171     | -      | 8 years                     | HR 0.78 (0.28-2.16)                                      | Age, gender, baseline serum creatinine, presence of hypertension, abdominal wall hernia, hepatic cyst, familial history of ADPKD, macroscopic hematuria, 24-h proteinuria, urinary stone, palpable kidneys in physical examination and use of ACEIs and/or ARBs |

Staplin et al, *AJKD*, "Smoking and Adverse Outcomes in Patients With CKD: The Study of Heart and Renal Protection (SHARP)"

| Author                  | Year | Design       | Population    | Mean eGFR | Reported consumption among current smokers | Outcome             | N   | Events | Average length of follow-up | Results (current vs not current smokers unless stated)                   | Additional covariates included in model                                                                |
|-------------------------|------|--------------|---------------|-----------|--------------------------------------------|---------------------|-----|--------|-----------------------------|--------------------------------------------------------------------------|--------------------------------------------------------------------------------------------------------|
| Orth <sup>15</sup>      | 1998 | Case-control | ADPKD/<br>IgA | n/a       |                                            | ESRD                | 204 | 102    |                             | OR for >5 pack years<br>4.5 (1.9-10.9) in men;<br>1.0 (0.3-3.4) in women | None                                                                                                   |
| Sawicki <sup>16</sup>   | 1994 | Prospective  | DN            | n/a       | Average 18 pack years                      | 1.36 ml/min<br>↓GFR | 93  | 25     | 1 year                      | OR 2.74 (1.57-4.81) per 10 pack years                                    | Age, sex, diabetes duration, HbA1c, BMI, daily protein intake, 24-h urinary sodium excretion, SBP, DBP |
| Chuahirun <sup>17</sup> | 2002 | Prospective  | DN            | 98        | Not stated                                 | Slope of eGFR       | 33  | -      | 5 years                     | -0.59 to -0.09 ml/min (p=0.009)                                          | Age, gender, ethnicity, initial mean BP, initial PCR                                                   |
| Phisitkul <sup>18</sup> | 2008 | Prospective  | DN            | 95        |                                            | Slope of 1/Cr       | 91  | -      |                             | Not stated. p=0.041                                                      | Age, sex, ethnicity, diabetes, SBP, urine albumin, HbA1c, LDL-C, HDL-C, eGFR                           |

**Abbreviations:**

2xCr = doubling of creatinine; 50%↓eGFR = halving of eGFR; ACEi = angiotensin converting enzyme inhibitor; ADPKD = autosomal dominant polycystic kidney disease; ARB = angiotensin receptor blocker; BMI = body-mass index; CCB = calcium channel blocker; CKD = chronic kidney disease; CVD = cardiovascular disease; DBP = diastolic blood pressure; DN = diabetic nephropathy; ESRD = end-stage renal disease; (e)GFR = (estimated) glomerular filtration rate; HR = hazard ratio; HDL-C = high density lipoprotein cholesterol; IgA = IgA nephropathy; IGT = impaired glucose tolerance; NSAID = non-steroidal anti-inflammatory drug; OR = odds ratio; PCR = protein creatinine ratio; SBP = systolic blood pressure

**Works Cited:**

1. Yoshida T, Takei T, Shiota S, et al. Risk factors for progression in patients with early-stage chronic kidney disease in the Japanese population. *Int Med* 2008; **47** (21): 1859-1864
2. Grams ME, Coresh J, Segev DL, Kucirka LM, Tighiouart H, Sarnak MJ. Vascular disease, ESRD, and death: interpreting competing risk analyses. *Clin J Am Soc Nephrol* 2012; **7** (10): 1606-1614
3. Tanaka K, Nakayama M, Kanno M, et al. Skin autofluorescence is associated with the progression of chronic kidney disease: a prospective observational study. *PLoS One* 2013; **8** (12): e83799
4. Ricardo AC, Anderson CA, Yang W, et al. Healthy lifestyle and risk of kidney disease progression, atherosclerotic events, and death in CKD: findings from the Chronic Renal Insufficiency Cohort (CRIC) Study. *Am J Kid Dis* 2015; **65** (3): 412-424
5. Haroun MK, Jaar BG, Hoffman SC, Comstock GW, Klag MJ, Coresh J. Risk factors for chronic kidney disease: a prospective study of 23,534 men and women in Washington County, Maryland. *J Am Soc Nephrol* 2003; **14** (11): 2934-2941
6. Shankar A, Klein R, Klein BE. The association among smoking, heavy drinking, and chronic kidney disease. *Am J Epidemiol* 2006; **164** (3): 263-271
7. Ishani A, Grandits GA, Grimm RH, et al. Association of single measurements of dipstick proteinuria, estimated glomerular filtration rate, and hematocrit with 25-year incidence of end-stage renal disease in the multiple risk factor intervention trial. *J Am Soc Nephrol* 2006; **17** (5): 1444-52
8. Yamagata K, Ishida K, Sairenchi T, et al. Risk factors for chronic kidney disease in a community-based population: a 10-year follow-up study. *Kidney Int.* 2007; **71** (2): 159-66
9. Yacoub R, Habib H, Lahdo A, et al. Association between smoking and chronic kidney disease: a case control study. *BMC Public Health.* 2010; **10**: 731
10. Hallan SI, Orth SR. Smoking is a risk factor in the progression to kidney failure. *Kidney Int.* 2011; **80** (5): 516-23
11. Lipworth L, Mumma MT, Cavanaugh KL, et al. Incidence and predictors of end stage renal disease among low-income blacks and whites. *PLoS One* 2012; **7** (10): e48407
12. Carter CE, Katz R, Kramer H, et al. Influence of urine creatinine concentrations on the relation of albumin-creatinine ratio with cardiovascular disease events: the Multi-Ethnic Study of Atherosclerosis (MESA). *Am J Kid Dis* 2013; **62** (4): 722-9
13. Paterson AD, Magistroni R, He N, et al. Progressive loss of renal function is an age-dependent heritable trait in type 1 autosomal dominant polycystic kidney disease. *J Am Soc Nephrol* 2005; **16** (3): 755-62

Staplin et al, *AJKD*, "Smoking and Adverse Outcomes in Patients With CKD: The Study of Heart and Renal Protection (SHARP)"

14. Ozkok A, Akpınar TS, Tufan F, et al. Clinical characteristics and predictors of progression of chronic kidney disease in autosomal dominant polycystic kidney disease: a single center experience. *Clin Exp Nephrol* 2013; **17** (3): 345-51
15. Orth SR, Stockmann A, Conrads C, et al. Smoking as a risk factor for end-stage renal failure in men with primary renal disease. *Kidney Int.* 1998; **54** (3): 926-31
16. Sawicki PT, Didjurgeit U, Muhlhauser I, Bender R, Heinemann L, Berger M. Smoking is associated with progression of diabetic nephropathy. *Diabetes Care* 1994; **17** (2): 126-31
17. Chuahirun T, Wesson DE. Cigarette smoking predicts faster progression of type 2 established diabetic nephropathy despite ACE inhibition. *Am J Kid Dis* 2002; **39** (2): 376-82
18. Phisitkul K, Hegazy K, Chuahirun T, et al. Continued smoking exacerbates but cessation ameliorates progression of early type 2 diabetic nephropathy. *Am J Med Sci* 2008; **335** (4): 284-91
