# Supplementary material for: Smoking and Adverse Outcomes in Patients With CKD: The Study of Heart and Renal Protection (SHARP)
Source: PubMed Central journal article supplement (PMC4996629; doi:10.1053/j.ajkd.2016.02.052), 2016-09
Supplement: mmc7.pdf [file mmc7.pdf]

**Figure S3: Relevance of baseline smoking status to annual rate of decline in eGFR, by baseline eGFR and baseline albumin:creatinine ratio, among 6245 patients not on dialysis at randomization**

(a) By baseline eGFR (mL/min/1.73m<sup>2</sup>)

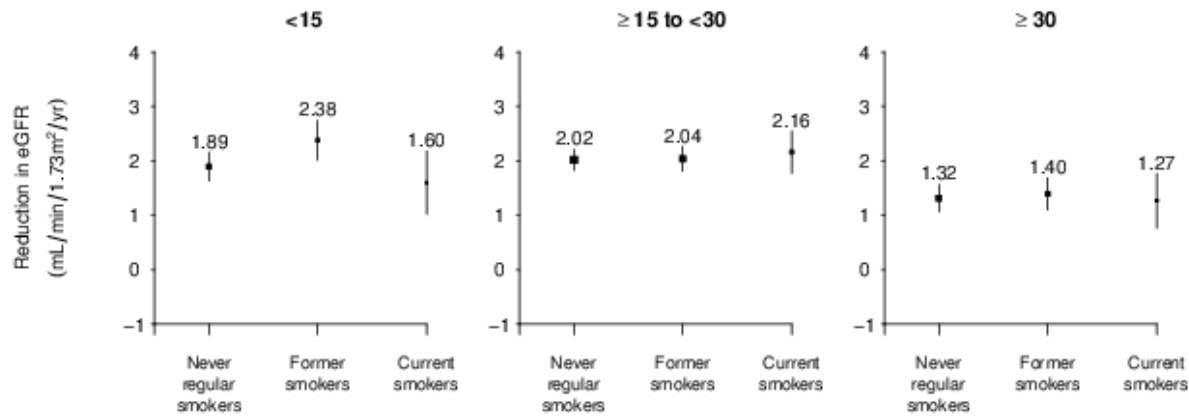

(b) By baseline albumin:creatinine ratio (mg/g)

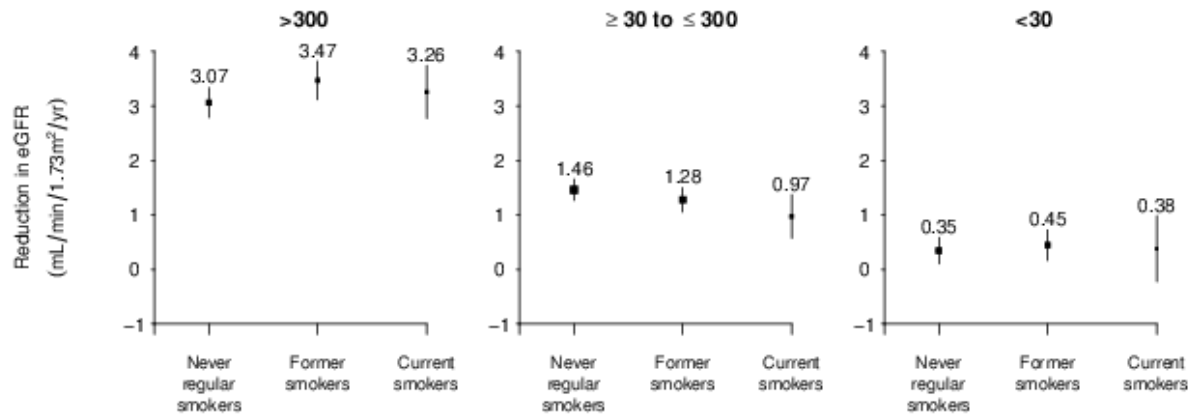

Rates adjusted for age, sex, ethnicity, country, education and prior disease (prior cardiovascular or diabetes).
