# Supplementary material for: Smoking and Adverse Outcomes in Patients With CKD: The Study of Heart and Renal Protection (SHARP)
Source: PubMed Central journal article supplement (PMC4996629; doi:10.1053/j.ajkd.2016.02.052), 2016-09
Supplement: mmc10.pdf [file mmc10.pdf]

**Figure S6: Relevance of baseline smoking status to ESRD, by cause of kidney disease**

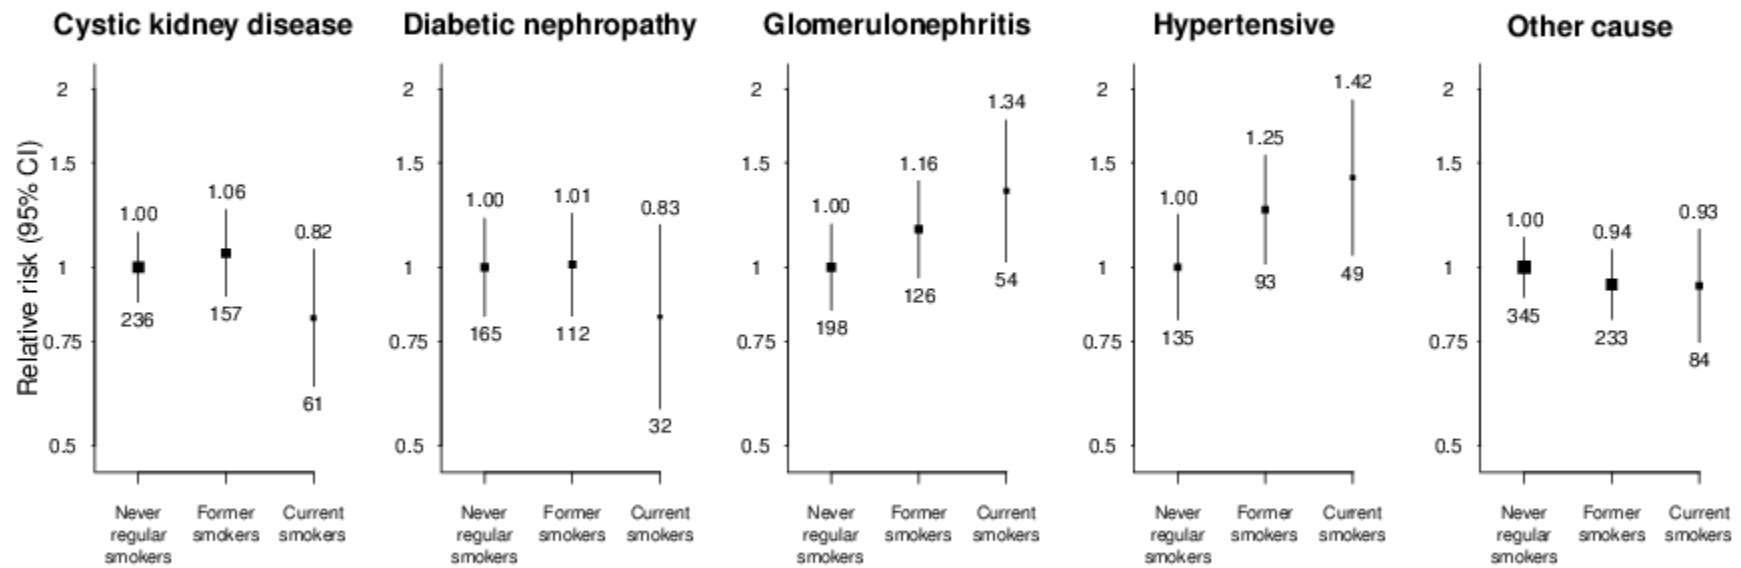

Relative risks adjusted for age, sex, ethnicity, country, education and prior disease. Test for interaction between smoking status and cause of kidney disease:  $\chi^2=11.2$ ;  $p=0.19$ .
